# Supplementary material for: A Review of Circumpolar Arctic Marine Mammal Health—A Call to Action in a Time of Rapid Environmental Change
Source: MDPI journal article supplement (doi:10.3390/pathogens12070937), 2023-07-14
Supplement: s1 [file s1]

Table S1—Index list of 35 pathogens included in this review.

**1. Bacteria (n=8):**

- a. *Brucella*
- b. *Coxiella burnetii*
- c. *Leptospira*
- d. *Vibrio parahaemolyticus*
- e. *Erysipelothrix rhusiopathiae*
- f. *Pasteurella*
- g. *Mycobacteria*
- h. *Nocardia*

**2. Fungal (n=3)**

- a. *Aspergillus*
- b. *Candida albicans*
- c. *Cryptococcus*

**3. Helminth Parasites (n=5)**

- a. *Trichinella*
- b. *Trematodes*
- c. *Cestoda*
- d. *Acanthocephala*
- e. *Nematoda*

**4. Parasitic Arthropods (n=3)**

- a. Seal louse (*Echinophthirius horridus*)
- b. Cyamids (*Cyamus ceti*)
- c. *Sarcoptes scabiei*

**5. Protozoan Parasites (n=6)**

- a. *Toxoplasma gondii*
- b. *Neospora caninum*
- c. *Sarcocystis* – *Sarcocystis neurona*
- d. *Giardia*
- e. *Cryptosporidium*
- f. *Eimeria*

**6. Viral (n=10)**

- a. Paramyxovirus
- b. Morbillivirus
- c. Influenza A viruse
- d. Coronavirus
- e. Calicivirus
- f. Adenovirus
- g. Herpesvirus
- h. Papillomavirus
- i. Poxvirus
- j. Rabies virus
